# Supplementary material
Source: publisher site journal article supplement (https://www.dovepress.com/article/236498)
Supplement: Supplementary file 1 [file get_supplementary_file.php]

Supplement 1. The details of all variables

| Variables | Number (%) or mean ± standard deviation (SD) |
| --- | --- |
| Age | 63.76 ±12.92 |
| Male | 975 (78.38%) |
| Heart rate, per min | 83.83 ± 16.85 |
| Systolic blood pressure, mmHg | 123.29 ± 22.06 |
| Diastolic blood pressure, mmHg | 77.21 ± 22.85 |
| Killip classification >= 2 | 348 (27.97%) |
| History of chest pain | 257 (20.66%) |
| History of smoke | 780 (62.70%) |
| History of hypertension | 580 (46.62%) |
| History of diabetes mellitus | 260 (20.90%) |
| History of COPD | 131 (10.53%) |
| History of bleeding | 45 (3.62) |
| Revascularization type | Described in table.1 |
| Revascularization therapy | 985 (79.18%) |
| Emergency revascularization | 605 (48.63%) |
| Emergency PCI | 582 (46.78%) |
| All PCI | 964 (77.49%) |
| Extramural thrombolysis | 88 (7.7%) |
| ventricular arrhythmia | 75 (6.03%) |
| Heart failure at admission | 428 (34.41%) |
| Left main lesions | 467 (37.54%) |
| Multiple vessel lesions | 383 (30.79%) |
| Use IABP | 118 (9.49%) |
| Thrombus aspiration | 106 (8.52%) |
| Anticoagulation | 733 (58.92%) |
| Antiplatelet | 1213 (97.51%) |
| diuretic | 625 (50.24%) |
| Beta blocker medication | 863 (69.37%) |
| ACEI/ARB medication | 622 (50%) |
| Statin medication | 1214 (97.59%) |
| Infection during hospitalization | 339 (27.25%) |
| NYHA >=2 at discharge | 124 (9.97%) |
| LVEF | 49.36 ± 10.59 |
| LVEF 40-50% and <40% | 538 (43.25%), 214 (17.20%) |
| Red blood cell counts, n×1012/L | 4.47 ± 0.70 |
| Hemoglobin, g/L | 126.11 ± 20.89 |
| Platelet, n×109/L | 178.81 ± 77.90 |
| White blood cell counts, n×109/L | 10.96 ± 4.41 |
| Total bile acids, umoll/L | 13.84 ± 7.64 |
| ALT, IU/L | 57.72 ± 147.74 |
| Albumin, g/L | 40.00 ± 4.49 |
| Blood glucose, g/L | 9.03 ± 4.14 |
| Blood urea nitrogen, mg/dL | 7.06 ± 4.23 |
| Blood creatinine, umol/L | 94.70 ± 63.16 |
| Serum cystatin C, mg/L | 1.12 ± 0.59 |
| Uric acid, umol/L | 373.42 ± 117.56 |
| Triglyceride, mmol/L | 1.62 ± 1.30 |
| Total cholesterol, mmol/L | 4.44 ± 1.11 |
| High-density lipoprotein, mmol/L | 1.19 ± 0.36 |
| Low-density lipoprotein, mmol/L | 2.72 ± 0.96 |
| Na+, mmol/L | 138.76 ± 3.72 |
| K+, mmol/L | 3.78 ± 0.50 |
| Activated partial thromboplastin time, s | 33.69 ± 21.52 |
| Prothrombin time, s | 12.37 ± 3.58 |
| Thrombin time, | 24.87 ± 20.95 |
| Fibrinogen, g/L | 3.35±1.28 |
| D-dimer, ug/mL | 11.76 ± 54.39 |
| cTnT, μg/L | 4692.59 ± 3603.50 |
| B-type natriuretic peptide, pg/mL | 3999.61± 7180.38 |

COPD: Chronic Obstructive Pulmonary Disease; PCI: Percutaneous coronary intervention; IABP: Intra-aortic balloon pump; NYHA: New York Heart Association; LVEF: Left ventricular ejection fraction; ALT: alanine aminotransferase
